# Supplementary figures and images for: A New NILM System Based on the SFRA Technique and Machine Learning
Source: MDPI journal article supplement (doi:10.3390/s23115226), 2023-05-31

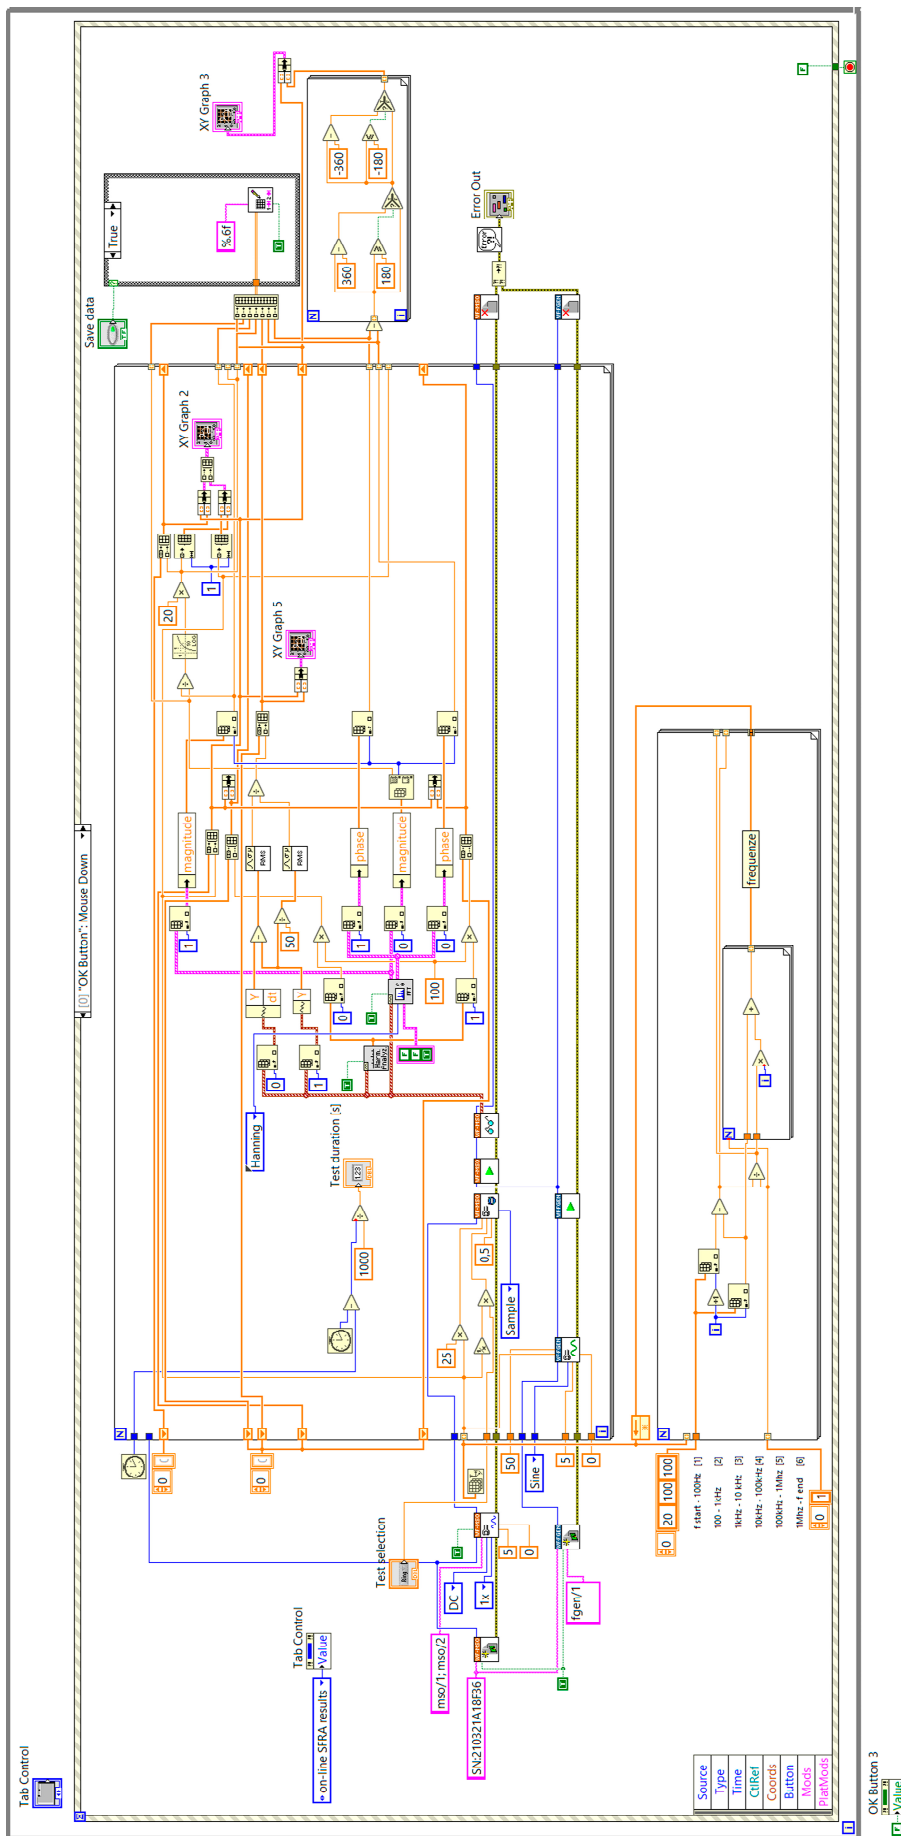

Figure S1. The block diagram of the LabVIEW code.

Supplement: s1 [file s1]
